# Supplementary material for: Enterococcal Phages: Food and Health Applications
Source: MDPI journal article supplement (doi:10.3390/antibiotics12050842), 2023-05-02
Supplement: s1 [file s1]

**Supplementary Table S1:** Complete bacteriophage genomes used for the construction of the phylogenetic tree. The family, subfamily and genus if known are indicated. The origin, genome size in bp and accession number are also indicated. UC: Unclassified; NI: Not indicated.

| Name          | Host                          | Family/<br>Subfamily                 | Genus                  | Origin              | Genome Size | Accession       |
|---------------|-------------------------------|--------------------------------------|------------------------|---------------------|-------------|-----------------|
| ECP3          | <i>E. faecalis</i>            | <i>Herelleviridae/Brockvirinae</i>   | <i>Kochikohdavirus</i> | NI                  | 145518      | KJ801817        |
| EFLK1         | <i>E. faecalis</i>            | <i>Herelleviridae/Brockvirinae</i>   | <i>Kochikohdavirus</i> | Sewage              | 130952      | KR049063        |
| MDA2          | <i>E. faecium</i>             | <i>Herelleviridae/Brockvirinae</i>   | <i>Kochikohdavirus</i> | NI                  | 140226      | MW633168        |
| PBEF129       | <i>E. faecalis</i>            | <i>Herelleviridae/Brockvirinae</i>   | <i>Kochikohdavirus</i> | NI                  | 144230      | MN854830        |
| phiEF24C      | <i>E. faecalis</i>            | <i>Herelleviridae/Brockvirinae</i>   | <i>Kochikohdavirus</i> | NI                  | 142072      | AP009390        |
| SW5           | <i>E. faecalis</i>            | <i>Herelleviridae/Brockvirinae</i>   | <i>Kochikohdavirus</i> | Sewage              | 143759      | ON286976        |
| vB EfaH EF1TV | <i>E. faecalis</i>            | <i>Herelleviridae/Brockvirinae</i>   | <i>Kochikohdavirus</i> | Hospital wastewater | 143507      | MK268686        |
| vB EfaM Ef2.1 | <i>E. faecalis</i>            | <i>Herelleviridae/Brockvirinae</i>   | <i>Kochikohdavirus</i> | Sewage water        | 140938      | MK693030        |
| vB EfaM Ef2.3 | <i>E. faecalis</i>            | <i>Herelleviridae/Brockvirinae</i>   | <i>Kochikohdavirus</i> | Sewage water        | 147289      | MK721192        |
| vB EfaS 156   | <i>E. faecalis</i>            | <i>Herelleviridae/Brockvirinae</i>   | <i>Kochikohdavirus</i> | Cheese              | 141133      | ERZ1464534      |
| vB OCPT Bob   | <i>Enterococcus</i> spp.      | <i>Herelleviridae/Brockvirinae</i>   | <i>Kochikohdavirus</i> | Sewage              | 142921      | ON113169        |
| vB OCPT Car   | <i>Enterococcus</i> spp.      | <i>Herelleviridae/Brockvirinae</i>   | <i>Kochikohdavirus</i> | Sewage              | 141483      | ON113168        |
| vB OCPT Carl  | <i>Enterococcus</i> spp.      | <i>Herelleviridae/Brockvirinae</i>   | <i>Kochikohdavirus</i> | Sewage              | 143879      | ON113167        |
| EFDG1         | <i>E. faecium/E. faecalis</i> | <i>Herelleviridae/Brockvirinae</i>   | <i>Schiekvirus</i>     | Sewage              | 147589      | KP339049        |
| EfsSzw-1      | <i>E. faecalis</i>            | <i>Herelleviridae/Brockvirinae</i>   | <i>Schiekvirus</i>     | Sewage water        | 150272      | MH791397        |
| GVEsP-1       | <i>Enterococcus</i> spp.      | <i>Herelleviridae/Brockvirinae</i>   | <i>Schiekvirus</i>     | River water         | 149913      | MZ333462        |
| PEf771        | <i>E. faecalis</i>            | <i>Herelleviridae/Brockvirinae</i>   | <i>Schiekvirus</i>     | Water               | 151052      | MN241318        |
| phiSHEF13     | <i>E. faecium</i>             | <i>Herelleviridae/Brockvirinae</i>   | <i>Schiekvirus</i>     | Wastewater          | 151389      | OL799258        |
| phiSHEF16     | <i>E. faecium</i>             | <i>Herelleviridae/Brockvirinae</i>   | <i>Schiekvirus</i>     | Wastewater          | 151935      | OL799260        |
| UTI-EfS3      | <i>E. faecalis</i>            | <i>Herelleviridae/Brockvirinae</i>   | <i>Schiekvirus</i>     | NI                  | 150393      | OL870611        |
| vB EfaH 163   | <i>E. faecium/E. faecalis</i> | <i>Herelleviridae/Brockvirinae</i>   | <i>Schiekvirus</i>     | Human stool         | 150836      | CAJDKA010000002 |
| vB OCPT Ben   | <i>E. faecalis</i>            | <i>Herelleviridae/Brockvirinae</i>   | <i>Schiekvirus</i>     | Sewage              | 151985      | MN027503        |
| vB OCPT Bill  | <i>Enterococcus</i> spp.      | <i>Herelleviridae/Brockvirinae</i>   | <i>Schiekvirus</i>     | Sewage              | 147049      | OM966901        |
| vB OCPT Bop   | <i>Enterococcus</i> spp.      | <i>Herelleviridae/Brockvirinae</i>   | <i>Schiekvirus</i>     | Sewage              | 153454      | ON125307        |
| vB OCPT CCS1  | <i>Enterococcus</i> spp.      | <i>Herelleviridae/Brockvirinae</i>   | <i>Schiekvirus</i>     | Sewage              | 150888      | ON113170        |
| vB EfaH 149   | <i>E. faecalis</i>            | <i>Herelleviridae/Brockvirinae</i>   | UC                     | Cheese              | 142215      | ERZ1464531      |
| EF62phi       | <i>E. faecalis</i>            | <i>Podoviridae/UC</i>                | UC                     | Human               | 30505       | CP002495        |
| SEsuP-1       | <i>Enterococcus</i> spp.      | <i>Podoviridae/UC</i>                | UC                     | Faeces              | 39319       | MZ333458        |
| AE4 17        | <i>E. faecalis</i>            | <i>Rountreeviridae/Sarlesvirinae</i> | <i>Copernicivirus</i>  | Sewage              | 18477       | NC 055866       |
| MDA1          | <i>E. faecium</i>             | <i>Rountreeviridae/Sarlesvirinae</i> | <i>Copernicivirus</i>  | NI                  | 18058       | MW623430        |
| idefix        | <i>Enterococcus</i> spp.      | <i>Rountreeviridae/Sarlesvirinae</i> | <i>Copernicivirus</i>  | NI                  | 18168       | NC 049937       |
| N13           | <i>E. faecalis</i>            | <i>Rountreeviridae/Sarlesvirinae</i> | <i>Copernicivirus</i>  | NI                  | 18449       | ON352054        |
| vB EfaP Ef6.2 | <i>E. faecalis</i>            | <i>Rountreeviridae/Sarlesvirinae</i> | <i>Copernicivirus</i>  | Sewage water        | 17966       | MK721188        |
| vB EfaP Ef6.3 | <i>E. faecalis</i>            | <i>Rountreeviridae/Sarlesvirinae</i> | <i>Copernicivirus</i>  | Sewage water        | 18136       | MK721196        |

|                |                                |                                       |                       |                 |       |            |
|----------------|--------------------------------|---------------------------------------|-----------------------|-----------------|-------|------------|
| vB EfaP Ef7.2  | <i>E. faecalis</i>             | <i>Rountreeviridae/Sarlesvirinae</i>  | <i>Copernicivirus</i> | Sewage water    | 18737 | MK721183   |
| vB EfaP Ef7.3  | <i>E. faecalis</i>             | <i>Rountreeviridae/Sarlesvirinae</i>  | <i>Copernicivirus</i> | Sewage water    | 18818 | MK721184   |
| vB EfaP Ef7.4  | <i>E. faecalis</i>             | <i>Rountreeviridae/Sarlesvirinae</i>  | <i>Copernicivirus</i> | Sewage water    | 18415 | MK721198   |
| vB EfaP Efmus1 | <i>E. faecalis</i>             | <i>Rountreeviridae/Sarlesvirinae</i>  | <i>Copernicivirus</i> | Sewage water    | 17927 | MK721195   |
| vB EfaP Efmus2 | <i>E. faecalis</i>             | <i>Rountreeviridae/Sarlesvirinae</i>  | <i>Copernicivirus</i> | Sewage water    | 18366 | MK721197   |
| vB EfaP Efmus3 | <i>E. faecalis</i>             | <i>Rountreeviridae/Sarlesvirinae</i>  | <i>Copernicivirus</i> | Sewage water    | 18286 | MK721185   |
| vB EfaP Efmus4 | <i>E. faecalis</i>             | <i>Rountreeviridae/Sarlesvirinae</i>  | <i>Copernicivirus</i> | Sewage water    | 18186 | MK721193   |
| vB EfaP IME195 | <i>E. faecalis</i>             | <i>Rountreeviridae/Sarlesvirinae</i>  | <i>Copernicivirus</i> | Hospital sewage | 18607 | NC 028693  |
| ZEF1           | <i>E. faecalis</i>             | <i>Rountreeviridae/Sarlesvirinae</i>  | <i>Copernicivirus</i> | Sewage          | 18454 | MT747434   |
| phiSHEF14      | <i>E. faecium</i>              | <i>Rountreeviridae/Sarlesvirinae</i>  | <i>Minhovirus</i>     | Wastewater      | 19390 | OL799259   |
| vB EfaP IME199 | <i>E. faecium</i>              | <i>Rountreeviridae/Sarlesvirinae</i>  | <i>Minhovirus</i>     | Hospital sewage | 18838 | NC 049931  |
| vB EfaP Zip    | <i>E. faecium/ E. faecalis</i> | <i>Rountreeviridae/Sarlesvirinae</i>  | <i>Minhovirus</i>     | Sewage          | 18742 | NC 049930  |
| vB OCPT Ump    | <i>Enterococcus spp.</i>       | <i>Rountreeviridae/Sarlesvirinae</i>  | <i>Minhovirus</i>     | Sewage          | 19707 | ON113181   |
| EFA-1          | <i>E. faecalis</i>             | <i>Siphoviridae/Autographiviridae</i> | <i>Studiervirinae</i> | NI              | 40712 | MT350292   |
| EFA-2          | <i>E. faecalis</i>             | <i>Siphoviridae/Autographiviridae</i> | <i>Studiervirinae</i> | NI              | 39964 | MT350293   |
| 9183           | <i>E. faecium</i>              | <i>Siphoviridae/Andrewesvirinae</i>   | <i>Denvervirus</i>    | Wastewater      | 86301 | NC 055907  |
| nattely        | <i>E. faecalis</i>             | <i>Siphoviridae/Andrewesvirinae</i>   | <i>Vipetofemvirus</i> | Wastewater      | 85669 | MT119360   |
| vipetofem      | <i>E. faecalis</i>             | <i>Siphoviridae/Andrewesvirinae</i>   | <i>Vipetofemvirus</i> | Wastewater      | 85371 | MT119361   |
| VWF            | <i>Enterococcus spp.</i>       | <i>Siphoviridae/Andrewesvirinae</i>   | <i>Vipetofemvirus</i> | NI              | 85865 | LT546029   |
| vB EfaS 140    | <i>E. faecalis</i>             | <i>Siphoviridae/Andrewesvirinae</i>   | UC                    | Cheese          | 85454 | ERZ1462946 |
| AUEF3          | <i>E. faecalis</i>             | <i>Siphoviridae</i>                   | <i>Efquatrovirus</i>  | Sewage          | 41257 | KJ127304   |
| Ec-ZZ2         | <i>E. faecium</i>              | <i>Siphoviridae</i>                   | <i>Efquatrovirus</i>  | Hospital sewage | 41170 | NC 031260  |
| EfaCPT1        | <i>E. faecalis</i>             | <i>Siphoviridae</i>                   | <i>Efquatrovirus</i>  | Sewage          | 40923 | JX193904   |
| EFap02         | <i>E. faecalis</i>             | <i>Siphoviridae</i>                   | <i>Efquatrovirus</i>  | Sewage          | 39766 | OL505084   |
| heks           | <i>E. faecalis</i>             | <i>Siphoviridae</i>                   | <i>Efquatrovirus</i>  | Wastewater      | 39708 | MT119359   |
| IME EF3        | <i>E. faecalis</i>             | <i>Siphoviridae</i>                   | <i>Efquatrovirus</i>  | Sewage          | 41687 | KF728385   |
| IME-EF4        | <i>Enterococcus spp.</i>       | <i>Siphoviridae</i>                   | <i>Efquatrovirus</i>  | Sewage          | 40692 | NC 023551  |
| LY0322         | <i>E. faecalis</i>             | <i>Siphoviridae</i>                   | <i>Efquatrovirus</i>  | NI              | 40934 | MH193369   |
| LY0323         | <i>E. faecalis</i>             | <i>Siphoviridae</i>                   | <i>Efquatrovirus</i>  | NI              | 40876 | MH375074   |
| MSF2           | <i>E. faecalis</i>             | <i>Siphoviridae</i>                   | <i>Efquatrovirus</i>  | NI              | 40880 | MK982307   |
| Nonaheksakonda | <i>E. faecalis</i>             | <i>Siphoviridae</i>                   | <i>Efquatrovirus</i>  | Wastewater      | 41994 | MK125140   |
| phiNASRA1      | <i>E. faecalis</i>             | <i>Siphoviridae</i>                   | <i>Efquatrovirus</i>  | NI              | 40139 | MG264739   |
| phiSHEF10      | <i>E. faecalis</i>             | <i>Siphoviridae</i>                   | <i>Efquatrovirus</i>  | Wastewater      | 41680 | OL799256   |
| phiSHEF11      | <i>E. faecalis</i>             | <i>Siphoviridae</i>                   | <i>Efquatrovirus</i>  | Wastewater      | 40790 | OL799257   |
| phiSHEF2       | <i>E. faecalis</i>             | <i>Siphoviridae</i>                   | <i>Efquatrovirus</i>  | Wastewater      | 41712 | MF678788   |
| phiSHEF4       | <i>E. faecalis</i>             | <i>Siphoviridae</i>                   | <i>Efquatrovirus</i>  | Wastewater      | 41081 | MF678789   |
| phiSHEF5       | <i>E. faecalis</i>             | <i>Siphoviridae</i>                   | <i>Efquatrovirus</i>  | Wastewater      | 41598 | MF678790   |
| PMBT2          | <i>E. faecalis</i>             | <i>Siphoviridae</i>                   | <i>Efquatrovirus</i>  | Sewage water    | 41489 | MG708276   |
| SANTOR1        | <i>E. faecalis</i>             | <i>Siphoviridae</i>                   | <i>Efquatrovirus</i>  | Sewage water    | 37933 | KX284704   |
| Sigurd         | <i>E. faecalis</i>             | <i>Siphoviridae</i>                   | <i>Efquatrovirus</i>  | Wastewater      | 41811 | MZ326865   |
| vB Efa29212 2e | <i>Enterococcus spp.</i>       | <i>Siphoviridae</i>                   | <i>Efquatrovirus</i>  | NI              | 41351 | OP559177   |
| vB EfaS 271    | <i>E. faecalis</i>             | <i>Siphoviridae</i>                   | <i>Efquatrovirus</i>  | Sewage          | 40197 | MT520979   |
| vB EfaS 785CC  | <i>E. faecalis</i>             | <i>Siphoviridae</i>                   | <i>Efquatrovirus</i>  | NI              | 40956 | MZ272341   |
| vB EfaS AL2    | <i>E. faecalis</i>             | <i>Siphoviridae</i>                   | <i>Efquatrovirus</i>  | Wastewater      | 40836 | MH203384   |

|                 |                               |                     |                     |                 |       |           |
|-----------------|-------------------------------|---------------------|---------------------|-----------------|-------|-----------|
| vB EfaS AL3     | <i>E. faecalis</i>            | <i>Siphoviridae</i> | <i>Efqatrovirus</i> | Wastewater      | 40789 | MH203383  |
| vB EfaS Ef5.1   | <i>E. faecalis</i>            | <i>Siphoviridae</i> | <i>Efqatrovirus</i> | Sewage          | 41141 | MK721199  |
| vB EfaS Ef5.2   | <i>E. faecalis</i>            | <i>Siphoviridae</i> | <i>Efqatrovirus</i> | Sewage          | 41418 | MK721186  |
| vB EfaS Ef5.3   | <i>E. faecalis</i>            | <i>Siphoviridae</i> | <i>Efqatrovirus</i> | Sewage          | 39115 | MK721200  |
| vB EfaS Ef5.4   | <i>E. faecalis</i>            | <i>Siphoviridae</i> | <i>Efqatrovirus</i> | Sewage          | 40685 | MK721191  |
| vB EfaS Ef6.1   | <i>E. faecalis</i>            | <i>Siphoviridae</i> | <i>Efqatrovirus</i> | Sewage          | 40429 | MK721187  |
| vB EfaS Ef6.4   | <i>E. faecalis</i>            | <i>Siphoviridae</i> | <i>Efqatrovirus</i> | Sewage          | 41133 | MK721190  |
| vB EfaS IME196  | <i>E. faecalis</i>            | <i>Siphoviridae</i> | <i>Efqatrovirus</i> | Hospital sewage | 38886 | NC 028990 |
| vB EfaS LM99    | <i>E. faecalis</i>            | <i>Siphoviridae</i> | <i>Efqatrovirus</i> | Sewage          | 40203 | MH355583  |
| vB EfaS Max     | <i>E. faecium/E. faecalis</i> | <i>Siphoviridae</i> | <i>Efqatrovirus</i> | Sewage          | 40975 | MK360024  |
| vB EfaS Paulomi | <i>E. faecalis</i>            | <i>Siphoviridae</i> | <i>Efqatrovirus</i> | Sewage          | 41921 | OL539449  |
| vB EfS L1       | <i>E. faecalis</i>            | <i>Siphoviridae</i> | <i>Efqatrovirus</i> | NI              | 41151 | OP254195  |
| vB OCPT CCS4    | <i>Enterococcus</i> spp.      | <i>Siphoviridae</i> | <i>Efqatrovirus</i> | Sewage          | 40050 | ON113176  |
| VEsP-2          | <i>Enterococcus</i> spp.      | <i>Siphoviridae</i> | <i>Efqatrovirus</i> | River water     | 43177 | MZ333461  |
| ZXL             | <i>E. faecalis</i>            | <i>Siphoviridae</i> | <i>Efqatrovirus</i> | Sewage          | 40804 | ON113334  |
| phiFL1A         | <i>E. faecalis</i>            | <i>Siphoviridae</i> | <i>Phifelvirus</i>  | NI              | 38764 | NC 013646 |
| phiFL1B         | <i>E. faecalis</i>            | <i>Siphoviridae</i> | <i>Phifelvirus</i>  | NI              | 38989 | GQ478082  |
| phiFL1C         | <i>E. faecalis</i>            | <i>Siphoviridae</i> | <i>Phifelvirus</i>  | NI              | 38721 | GQ478083  |
| phiFL2A         | <i>E. faecalis</i>            | <i>Siphoviridae</i> | <i>Phifelvirus</i>  | NI              | 36270 | GQ478084  |
| phiFL2B         | <i>E. faecalis</i>            | <i>Siphoviridae</i> | <i>Phifelvirus</i>  | NI              | 36826 | GQ478085  |
| phiFL3A         | <i>E. faecalis</i>            | <i>Siphoviridae</i> | <i>Phifelvirus</i>  | NI              | 39576 | NC 013648 |
| phiFL3B         | <i>E. faecalis</i>            | <i>Siphoviridae</i> | <i>Phifelvirus</i>  | NI              | 40275 | GQ478087  |
| 47              | <i>E. faecalis</i>            | <i>Siphoviridae</i> | <i>Saphexavirus</i> | NI              | 57289 | ON086985  |
| BC-611          | <i>E. faecalis</i>            | <i>Siphoviridae</i> | <i>Saphexavirus</i> | NI              | 53996 | AB712291  |
| EFap05-1        | <i>E. faecalis</i>            | <i>Siphoviridae</i> | <i>Saphexavirus</i> | Sewage          | 56564 | OL505085  |
| EFKL            | <i>E. faecalis</i>            | <i>Siphoviridae</i> | <i>Saphexavirus</i> | Sewage          | 58343 | OP831581  |
| EF-P29          | <i>E. faecalis</i>            | <i>Siphoviridae</i> | <i>Saphexavirus</i> | Sewage          | 58984 | KY303907  |
| Entf1           | <i>E. faecalis</i>            | <i>Siphoviridae</i> | <i>Saphexavirus</i> | Sewage          | 58938 | MK800154  |
| IME EF1         | <i>E. faecalis</i>            | <i>Siphoviridae</i> | <i>Saphexavirus</i> | Sewage          | 57081 | KF192053  |
| SAP6            | <i>E. faecalis</i>            | <i>Siphoviridae</i> | <i>Saphexavirus</i> | NI              | 58619 | JF731128  |
| SSsP-1          | <i>Enterococcus</i> spp.      | <i>Siphoviridae</i> | <i>Saphexavirus</i> | Faeces          | 57270 | MZ333457  |
| UTI-EfS7        | <i>E. faecalis</i>            | <i>Siphoviridae</i> | <i>Saphexavirus</i> | NI              | 56144 | OL870612  |
| vB EfaS EF1c55  | <i>E. faecalis</i>            | <i>Siphoviridae</i> | <i>Saphexavirus</i> | NI              | 55876 | MN103542  |
| vB EfaS Ef2.2   | <i>E. faecalis</i>            | <i>Siphoviridae</i> | <i>Saphexavirus</i> | Sewage          | 58400 | MK721189  |
| vB EfaS Ef7.1   | <i>E. faecalis</i>            | <i>Siphoviridae</i> | <i>Saphexavirus</i> | Sewage          | 58018 | MK721194  |
| vB EfaS HEf13   | <i>E. faecalis</i>            | <i>Siphoviridae</i> | <i>Saphexavirus</i> | NI              | 57811 | MH618488  |
| vB EfaS IME198  | <i>E. faecalis</i>            | <i>Siphoviridae</i> | <i>Saphexavirus</i> | Hospital sewage | 58000 | NC 029016 |
| vB EfaS PHB08   | <i>E. faecalis</i>            | <i>Siphoviridae</i> | <i>Saphexavirus</i> | NI              | 55244 | MK570225  |
| vB OCPT CCS2    | <i>Enterococcus</i> spp.      | <i>Siphoviridae</i> | <i>Saphexavirus</i> | Sewage          | 57735 | ON113173  |
| vB OCPT PG11    | <i>Enterococcus</i> spp.      | <i>Siphoviridae</i> | <i>Saphexavirus</i> | Sewage          | 57092 | ON113179  |
| vB OCPT PG13    | <i>Enterococcus</i> spp.      | <i>Siphoviridae</i> | <i>Saphexavirus</i> | Sewage          | 57775 | ON113180  |
| vB OCPT PG2     | <i>Enterococcus</i> spp.      | <i>Siphoviridae</i> | <i>Saphexavirus</i> | Sewage          | 57485 | ON113177  |
| vB OCPT PG9     | <i>Enterococcus</i> spp.      | <i>Siphoviridae</i> | <i>Saphexavirus</i> | Sewage          | 57478 | ON113178  |
| vB OCPT SDS1    | <i>Enterococcus</i> spp.      | <i>Siphoviridae</i> | <i>Saphexavirus</i> | Sewage          | 55880 | ON113171  |

|                |                          |                     |                     |             |       |            |
|----------------|--------------------------|---------------------|---------------------|-------------|-------|------------|
| vB OCPT SDS2   | <i>Enterococcus</i> spp. | <i>Siphoviridae</i> | <i>Saphexavirus</i> | Sewage      | 57457 | ON113172   |
| vB OCPT Toy    | <i>Enterococcus</i> spp. | <i>Siphoviridae</i> | <i>Saphexavirus</i> | Sewage      | 57304 | ON113175   |
| VD13           | <i>E. faecalis</i>       | <i>Siphoviridae</i> | <i>Saphexavirus</i> | NI          | 55113 | KJ094032   |
| 9181           | <i>E. faecium</i>        | <i>Siphoviridae</i> | UC                  | Wastewater  | 71854 | MT939240   |
| 9184           | <i>E. faecium</i>        | <i>Siphoviridae</i> | UC                  | Wastewater  | 44108 | MT939242   |
| EFAP-1         | <i>E. faecalis</i>       | <i>Siphoviridae</i> | UC                  | NI          | 21115 | FJ792813   |
| EFC-1          | <i>E. faecalis</i>       | <i>Siphoviridae</i> | UC                  | Sewage      | 40286 | KJ608188   |
| EFP1           | <i>E. faecium</i>        | <i>Siphoviridae</i> | UC                  | NI          | 37561 | MN995824   |
| EFRM31         | <i>E. faecalis</i>       | <i>Siphoviridae</i> | UC                  | NI          | 16945 | GU815339   |
| IME-EFm1       | <i>E. faecium</i>        | <i>Siphoviridae</i> | UC                  | Sewage      | 42597 | NC 024356  |
| IME-EFm5       | <i>E. faecium</i>        | <i>Siphoviridae</i> | UC                  | Sewage      | 42265 | NC 028826  |
| phiEf11        | <i>E. faecalis</i>       | <i>Siphoviridae</i> | UC                  | NI          | 42822 | GQ452243   |
| phiFL4A        | <i>E. faecalis</i>       | <i>Siphoviridae</i> | UC                  | NI          | 37856 | NC 013644  |
| Q69            | <i>E. faecalis</i>       | <i>Siphoviridae</i> | UC                  | Cheese      | 42141 | ERZ1464538 |
| vB EfaS 159    | <i>E. faecalis</i>       | <i>Siphoviridae</i> | UC                  | Cheese      | 41718 | ERZ1464547 |
| vB EfaS DELF1  | <i>E. faecalis</i>       | <i>Siphoviridae</i> | UC                  | NI          | 40248 | LC513943   |
| vB EfaS IME197 | <i>E. faecalis</i>       | <i>Siphoviridae</i> | UC                  | NI          | 41098 | KT945994   |
| vB Efm LG62    | <i>E. faecium</i>        | <i>Siphoviridae</i> | UC                  | Sewage      | 42236 | OP018674   |
| VEsP-1         | <i>Enterococcus</i> spp. | <i>Siphoviridae</i> | UC                  | River water | 39221 | MZ333456   |
